# Supplementary material
Source: Copernicus journal article supplement (doi:10.5194/acp-26-4901-2026)
Supplement: Supplementary file 1 [file acp-26-4901-2026-supplement.pdf]

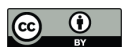

*Supplement of*

## **Impact of primary oxygenated volatile organic compounds on ozone formation in the Yangtze River Delta region**

**Xun Li et al.**

*Correspondence to:* Jingyi Li ([jingyili@nuist.edu.cn](mailto:jingyili@nuist.edu.cn))

The copyright of individual parts of the supplement might differ from the article licence.

## S1. Model evaluation

The Pearson correlation coefficient (R), mean bias (MB), mean error (ME), normalized mean bias (NMB), normalized mean error (NME), root mean square error (RMSE), and index of agreement (IOA) were used to evaluate the model's performance in simulating meteorological parameters and air pollutants. These statistical metrics were calculated as follows:

$$R = \frac{\sum(P_i - \bar{P}) \times (O_i - \bar{O})}{\sqrt{\sum(P_i - \bar{P})^2 \times \sum(O_i - \bar{O})^2}} \quad (S1)$$

$$MB = \frac{1}{N} \sum (P_i - O_i) \quad (S2)$$

$$ME = \frac{1}{N} \sum |P_i - O_i| \quad (S3)$$

$$NMB = \frac{\sum(P_i - O_i)}{\sum O_i} \quad (S4)$$

$$NME = \frac{\sum |P_i - O_i|}{\sum O_i} \quad (S5)$$

$$RMSE = \sqrt{\frac{1}{N} \sum (P_i - O_i)^2} \quad (S6)$$

$$IOA = 1 - \frac{\sum (P_i - O_i)^2}{\sum (|P_i - \bar{O}| + |O_i - \bar{O}|)^2} \quad (S7)$$

where P and O represent the predicted and observed values, respectively; the subscript i denotes the i<sup>th</sup> data point in a dataset of size N;  $\bar{P}$  and  $\bar{O}$  indicate the mean values of predictions and observations, respectively. NMB and NME were calculated without conversion to percentage form and are reported as fractions.

Hourly averages of temperature (T), relative humidity (RH), wind speed (WS), and wind direction (WD) from model simulations and observations at Xujiahui Station (Shanghai), Maigaoqiao Station (Nanjing), Mingzhu Square Station (Hefei), and Binjiang Station

(Hangzhou) in EP1 and EP2 are shown in Figs. S2 and S3, respectively. Among these four meteorological parameters, temperature was reproduced most accurately, with high R ( $> 0.8$ ) and IOA (approaching 1.0) values as shown in Table S3. The model also performed reasonably well for RH, showing  $R > 0.68$  and  $ME < 14\%$ . For wind fields, the model generally captured both spatial and temporal variations, but tended to overestimate WS across all cities in both episodes, except in Hefei (HF). The agreement between predictions and observations was stronger in EP1 than in EP2. A similar pattern was observed for WD, which was better reproduced in EP1. Statistical metrics for T and WS met benchmark thresholds in most cities, indicating satisfactory model performance.

Comparisons between modeled and observed MDA8 ozone concentrations in representative cities of the YRD during the two episodes are shown in Figs. S4 and S5, respectively. The model generally reproduced the temporal variations at most stations, with IOA values exceeding 0.5 (Table S4). Peak concentrations were captured more accurately in EP2 than in EP1. However, the model tended to overestimate ozone levels below 40 ppb toward the end of EP1 and throughout EP2. This bias likely reflects limitations in the model's ability to represent background ozone. Additional contributions to this overestimation may arise from uncertainties in VOC and  $\text{NO}_x$  emissions in the current inventory.

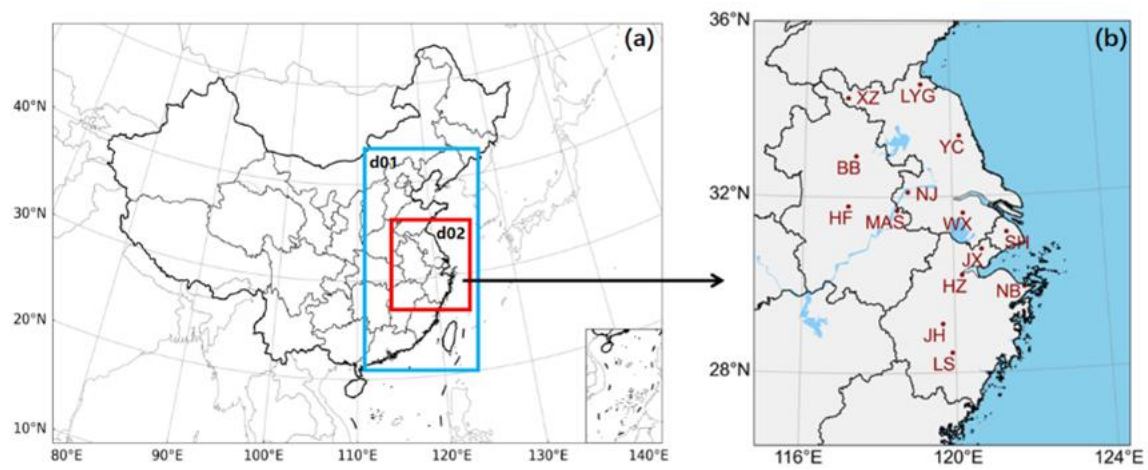

**Figure S1.** Simulation domains of CMAQ.

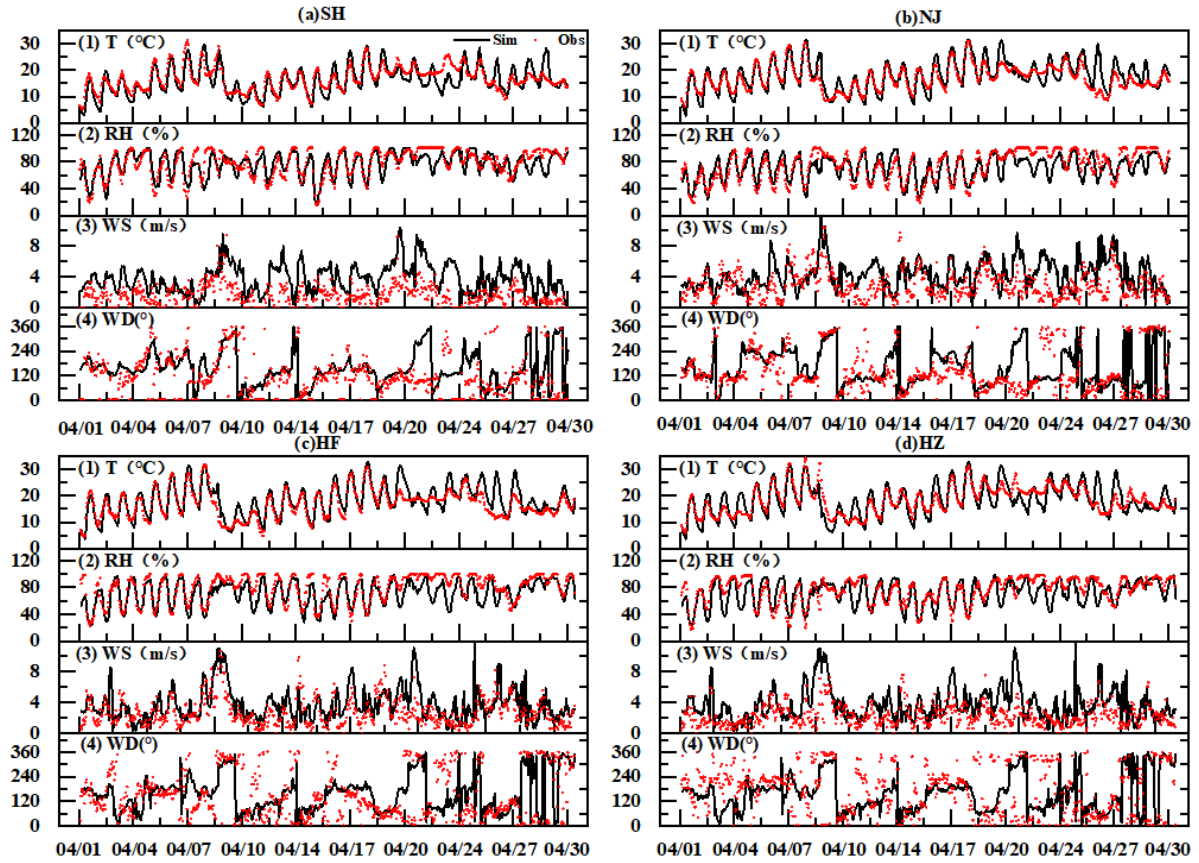

**Figure S2.** Comparison of simulated and observed temperature (T), relative humidity (RH), wind speed (WS), and wind direction (WD) at stations in Shanghai (SH), Nanjing (NJ), Hefei (HF), and Hangzhou (HZ) in April 2019 (EP1).

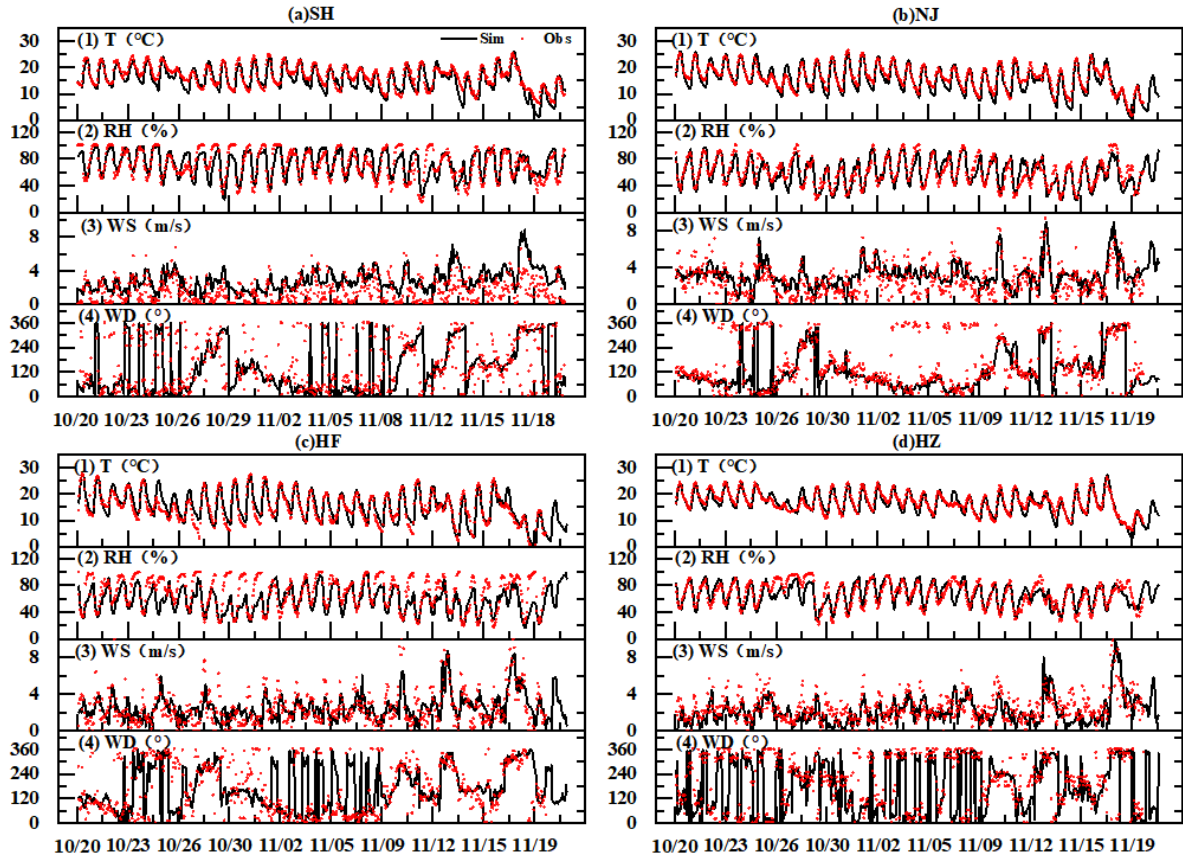

**Figure S3.** Same as Fig. S2, but for October–November 2019 (EP2).

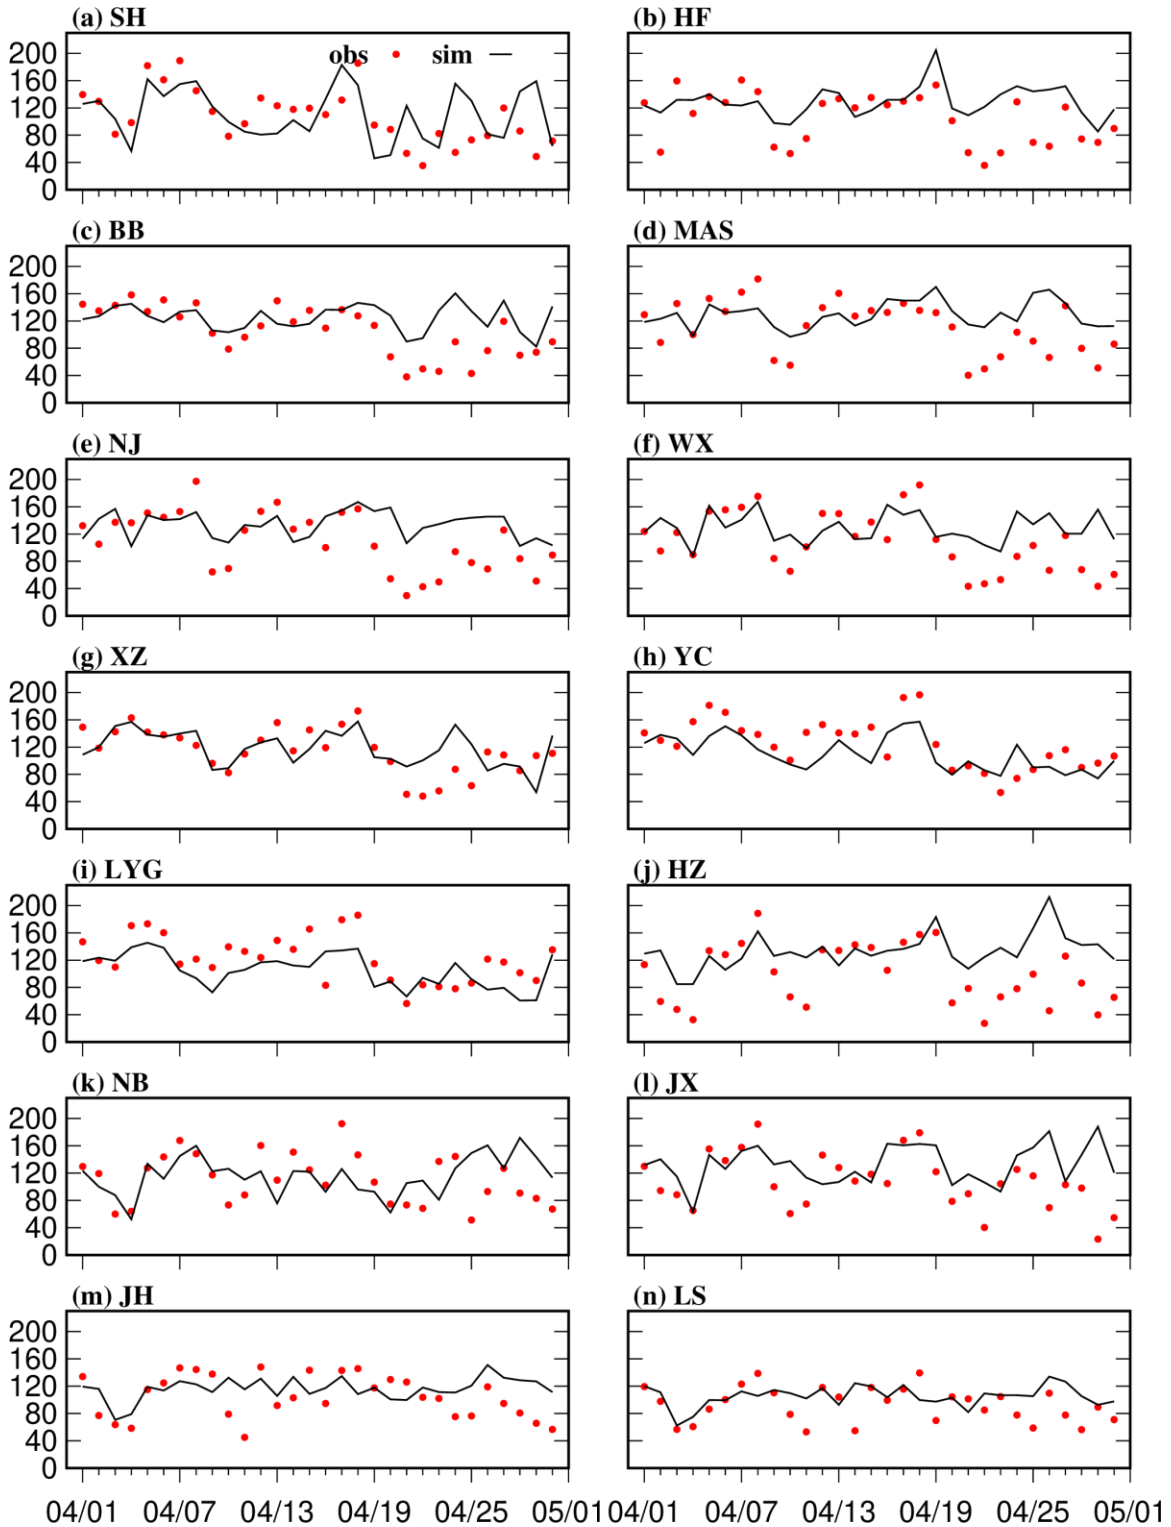

**Figure S4.** Temporal variations of MDA8 ozone concentrations across selected cities in the YRD region in EP1 ( $\mu\text{g m}^{-3}$ ).

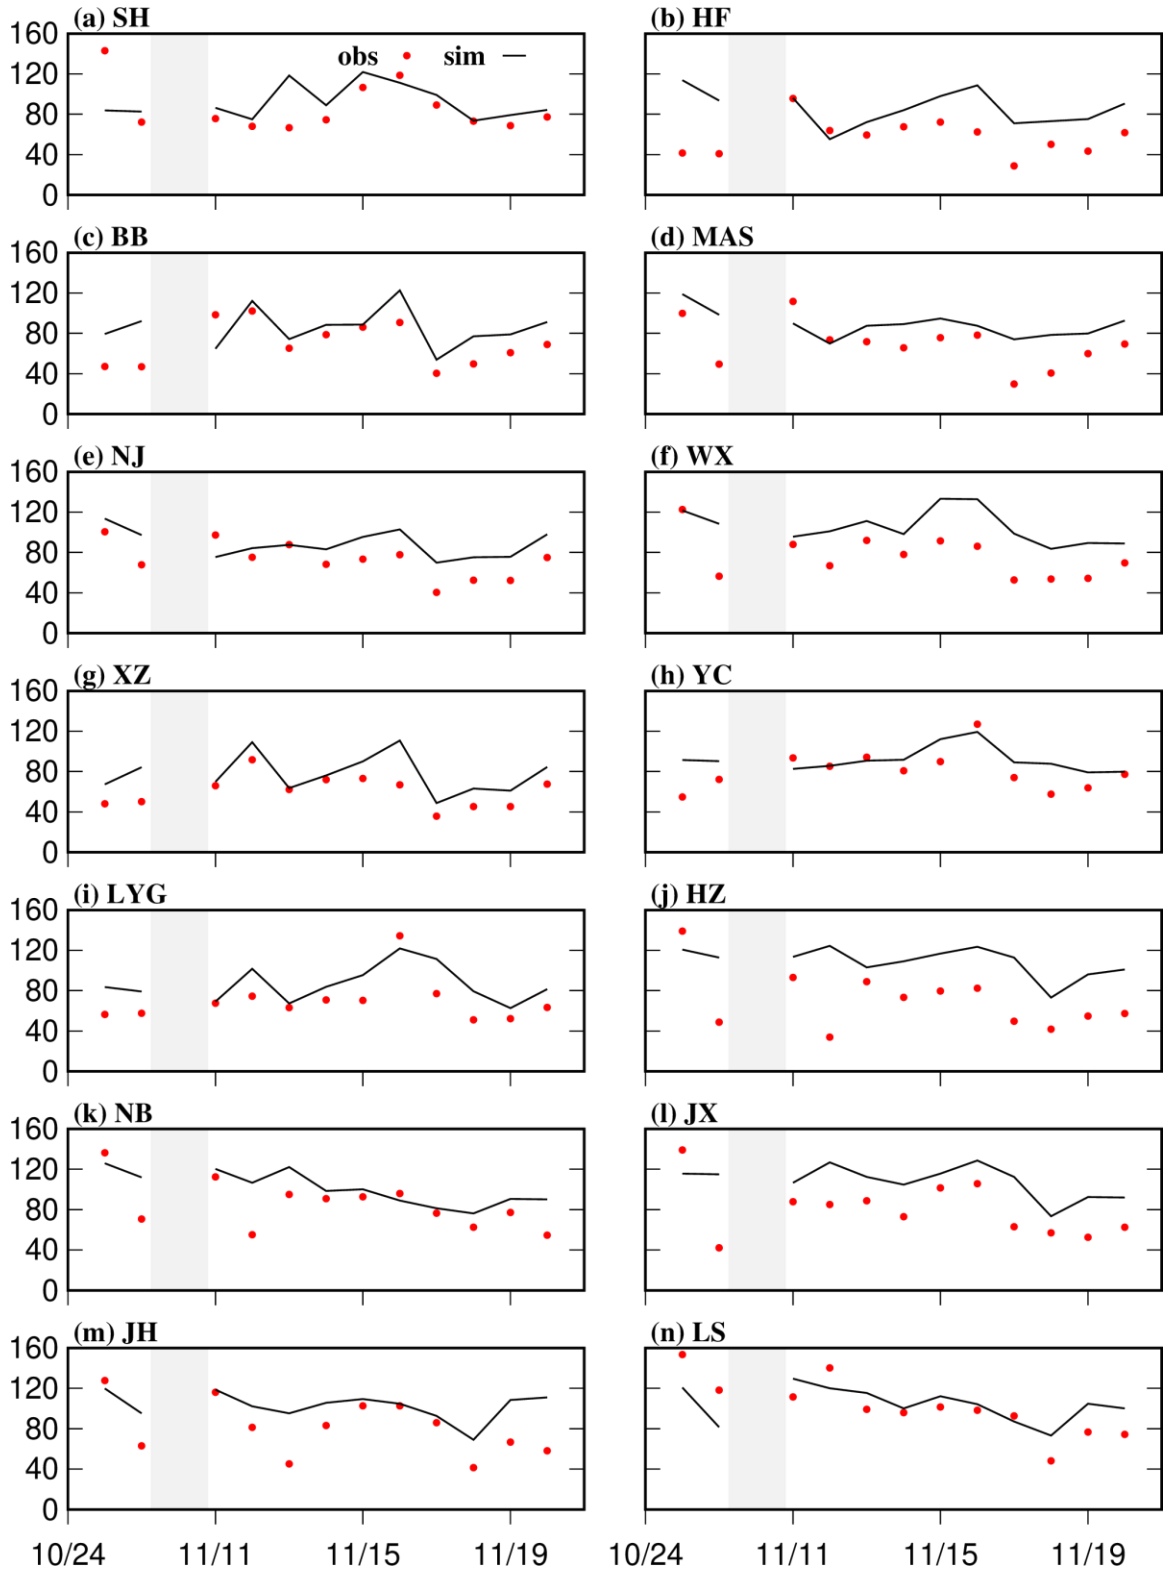

**Figure S5.** Same as Fig. S4, but for October–November 2019 (EP2). Gray shaded areas denote the China International Import Expo 2019 (CIIE) period.

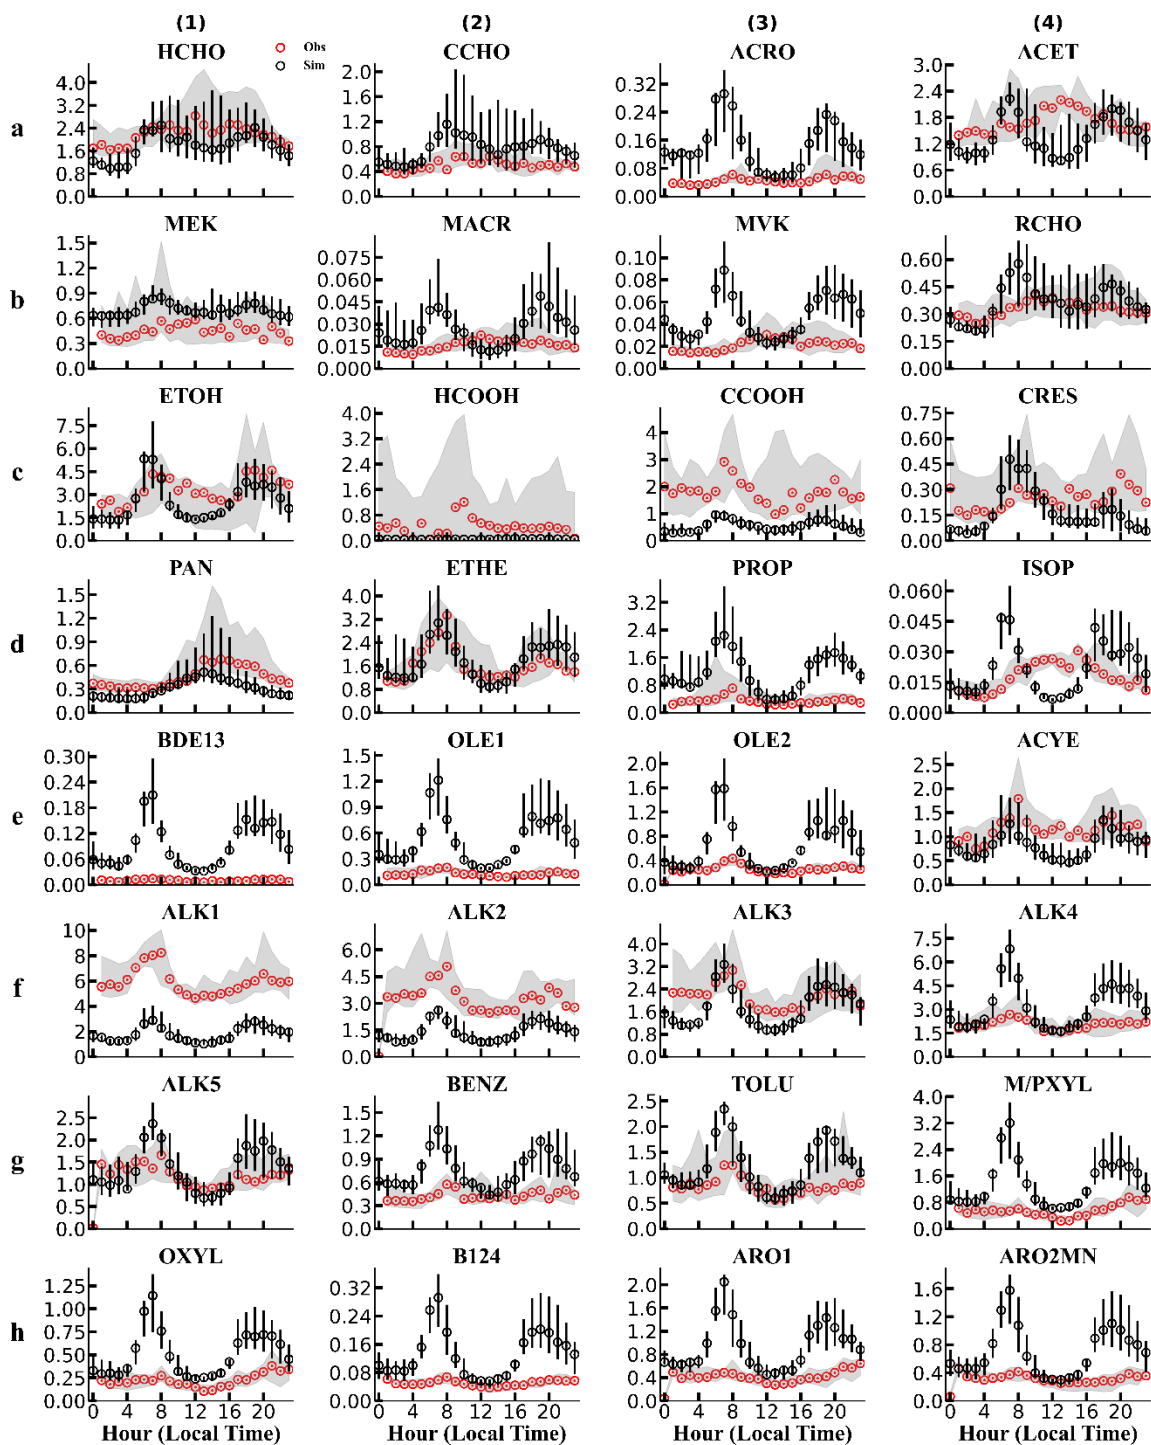

**Figure S6.** Diurnal variations of OVOCs and their precursors at SAES in EP2 (ppb). Red and black circles indicate the median observed and model-predicted values, respectively; shaded areas and black bars represent the 25<sup>th</sup>–75<sup>th</sup> percentile ranges for observations and model predictions, respectively.

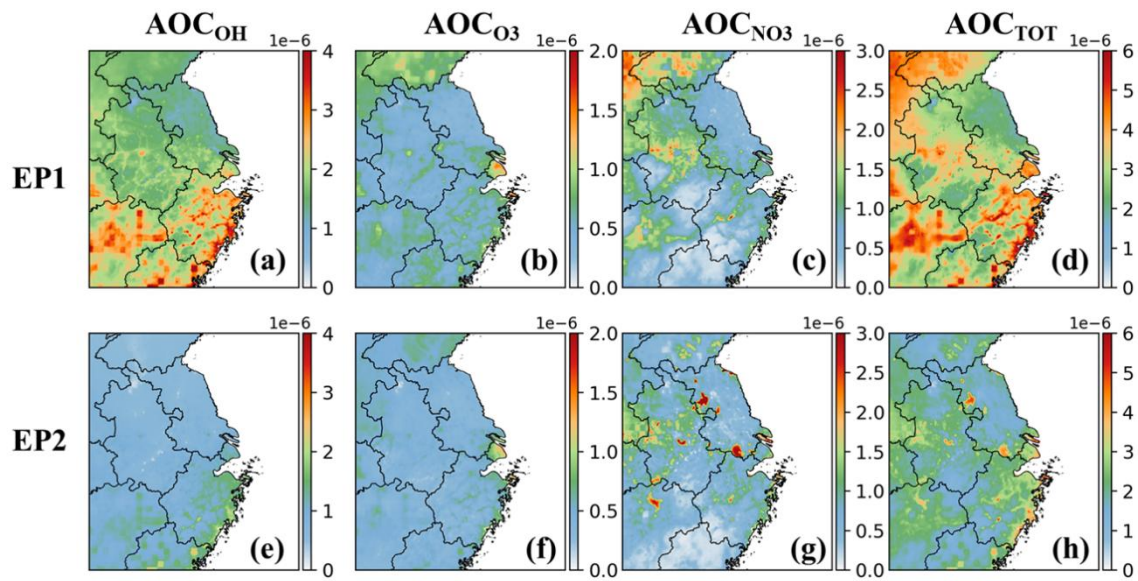

**Figure S7.** Atmospheric oxidation capacity (AOC) during the two episodes, contributed by OH radicals ( $AOC_{OH}$ ; a, e),  $O_3$  ( $AOC_{O_3}$ ; b, f),  $NO_3$  radicals ( $AOC_{NO_3}$ ; c, g), and total AOC ( $AOC_{TOT}$ ; d, h) ( $s^{-1}$ ). AOC was calculated following Qin et al<sup>1</sup>.

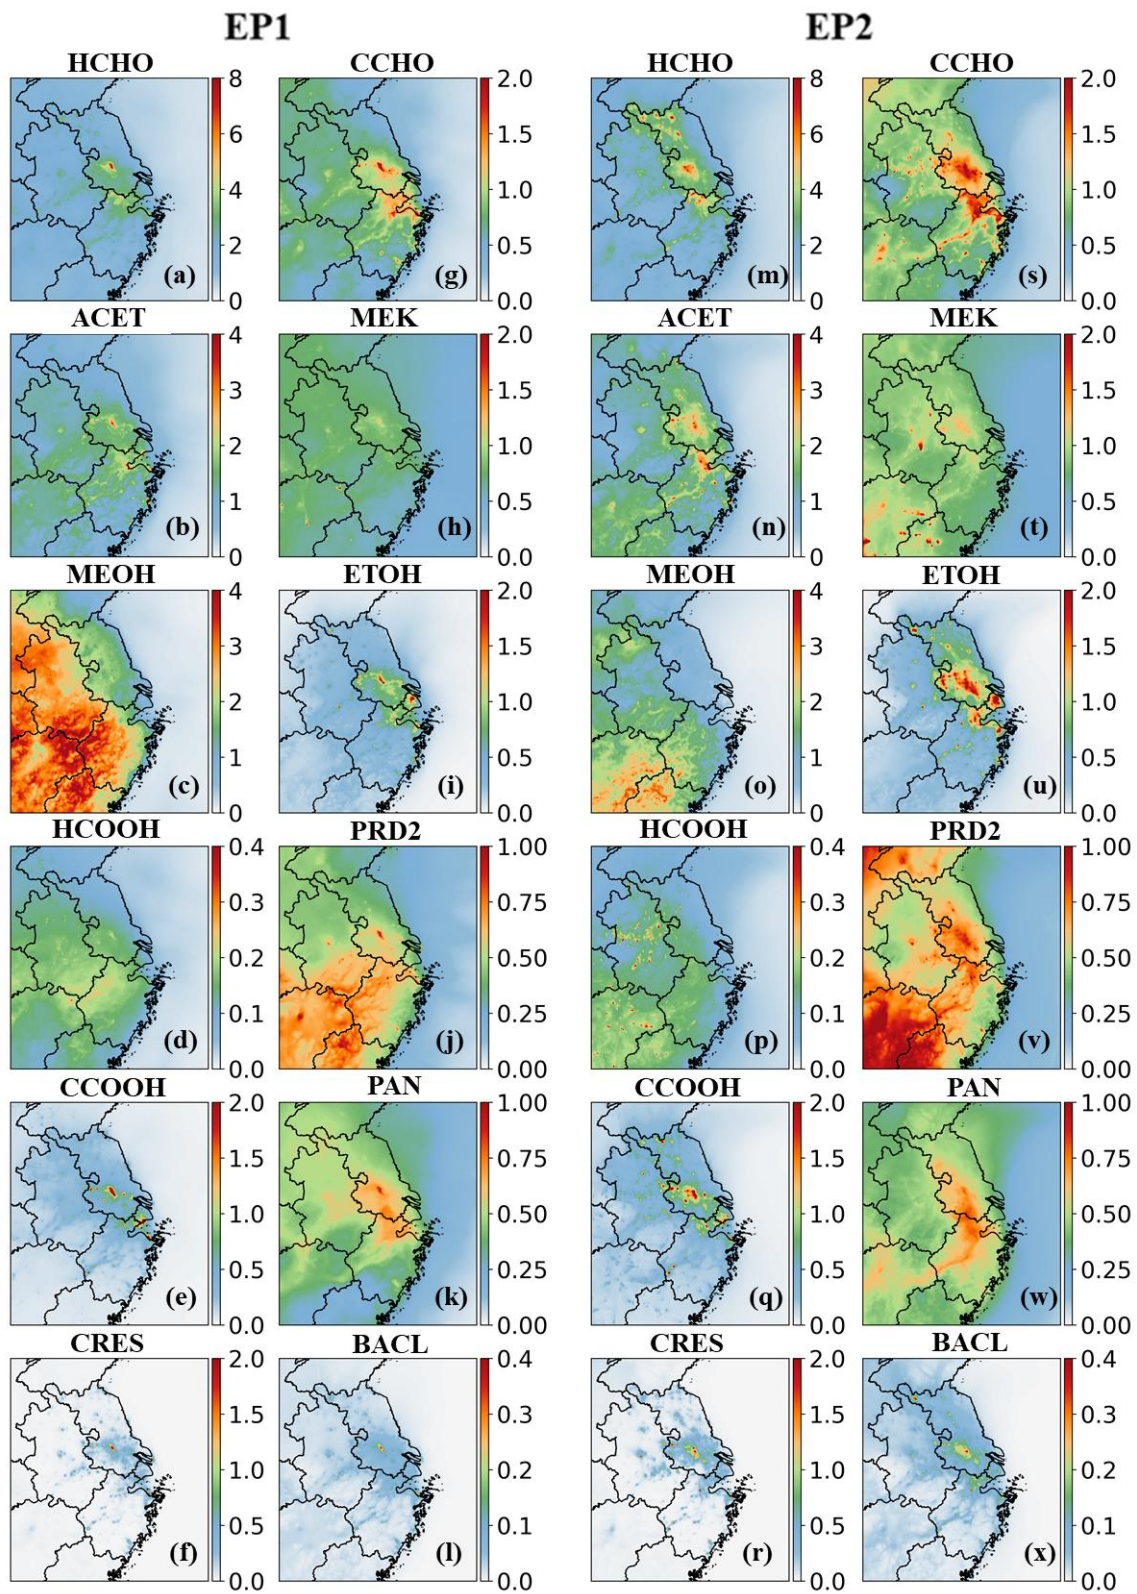

**Figure S8.** Spatial distributions of major OVOC species in EP1 (a–l) and EP2 (m–x) (ppb).

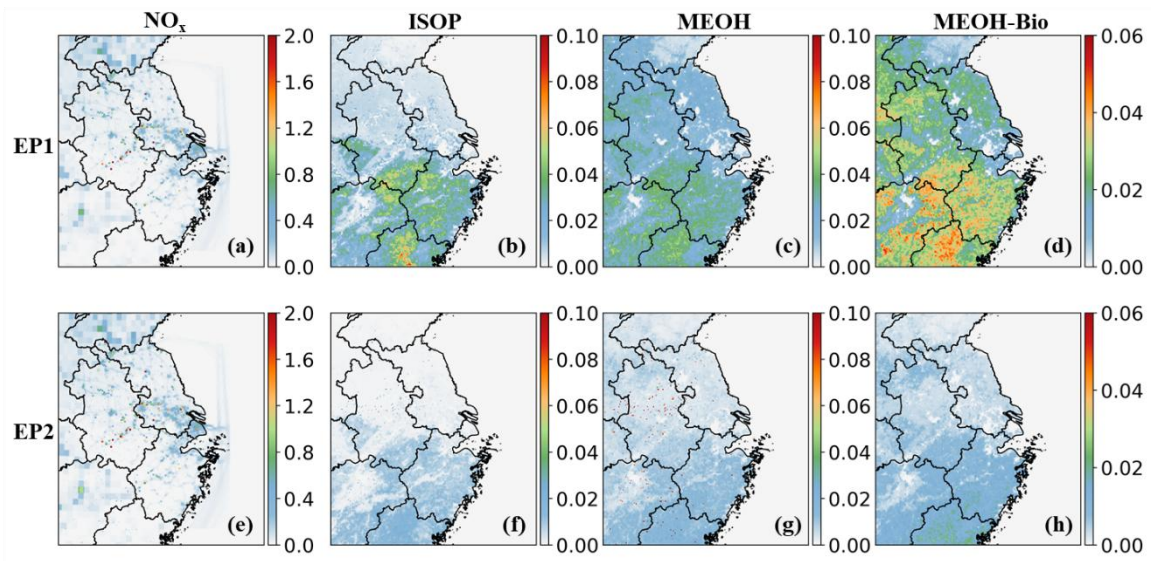

**Figure S9.** Average emission rates of  $\text{NO}_x$ , isoprene, MEOH, and biogenic MEOH during EP1 and EP2. Units are  $\text{mole s}^{-1}$ .

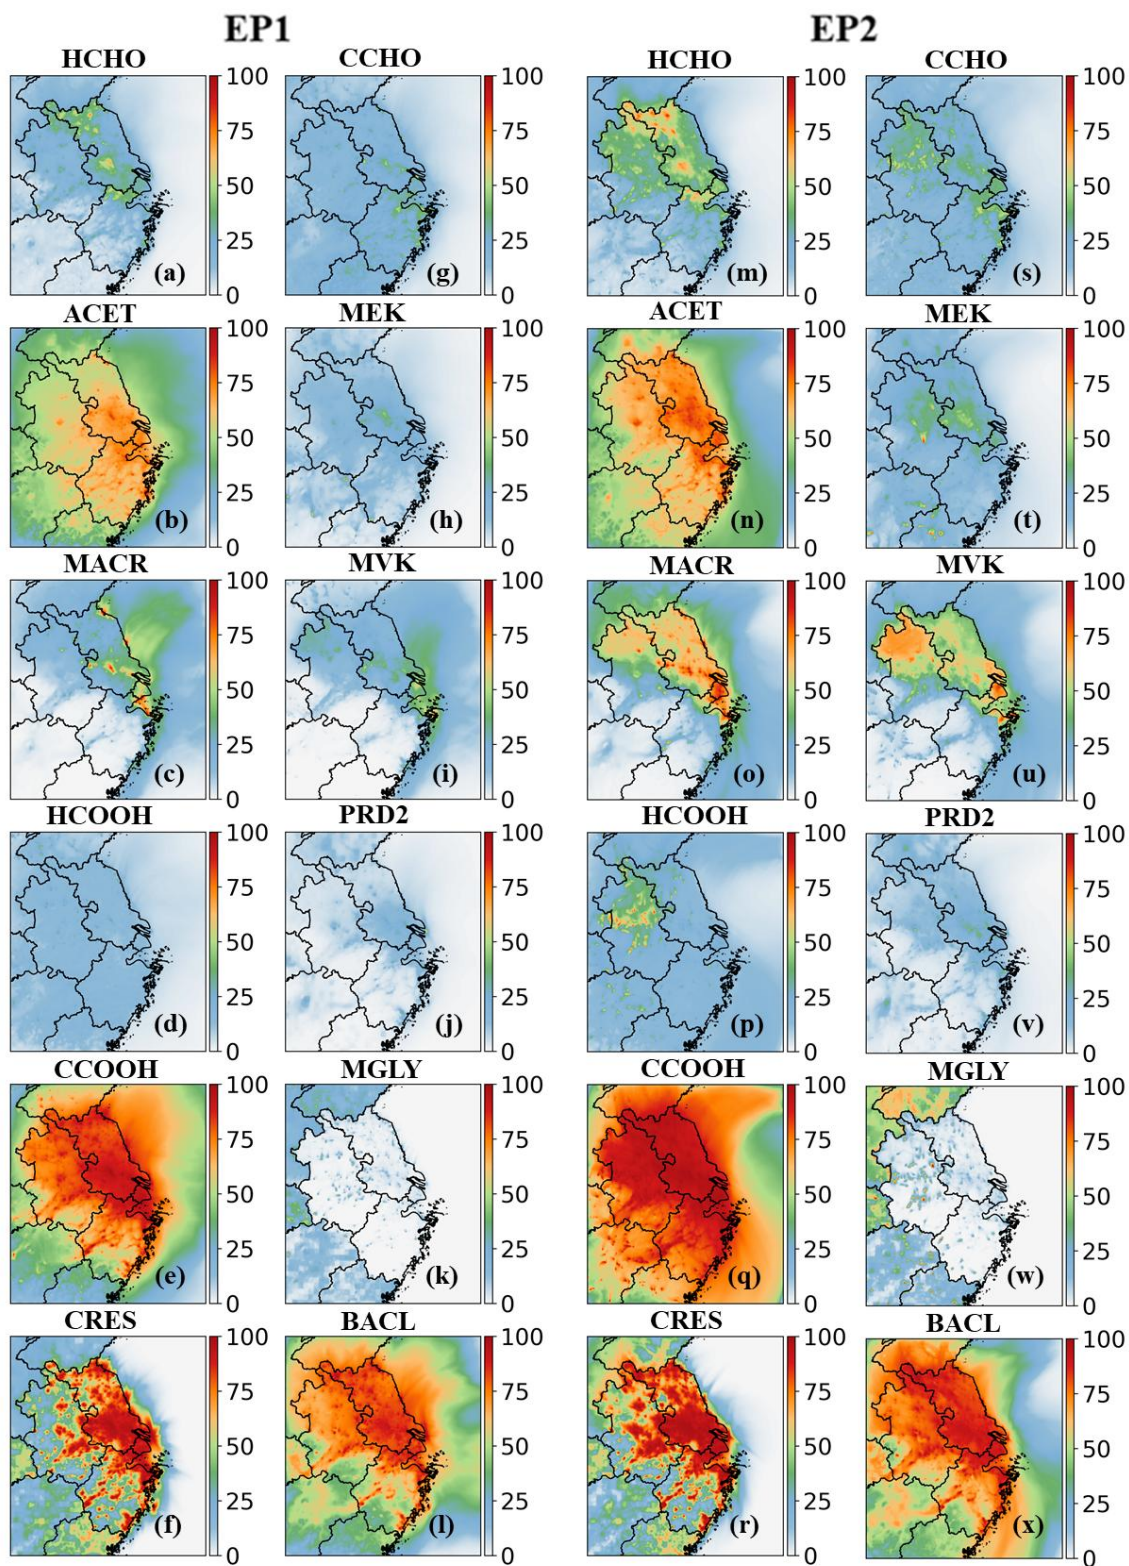

**Figure S10.** Emission contributions to individual OVOC species in EP1 (a-l) and EP2 (m-x).

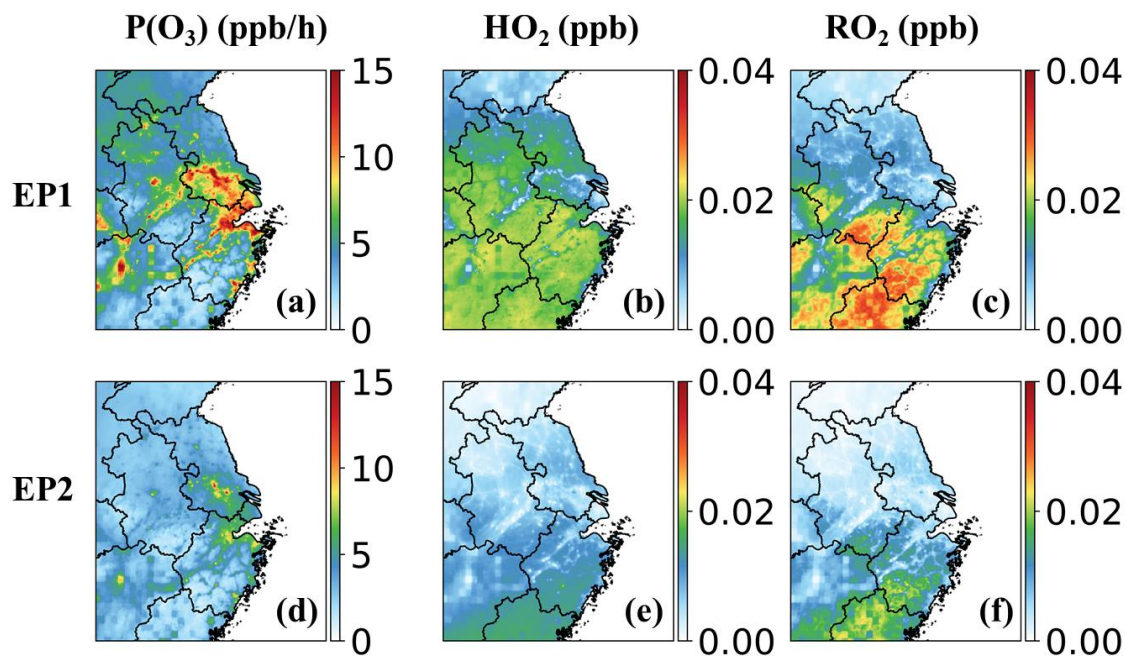

**Figure S11.** Average daytime ozone production rates ( $P(O_3)$ , a, d),  $HO_2$  concentrations (b, e), and  $RO_2$  concentrations (c, f) during EP1 and EP2.

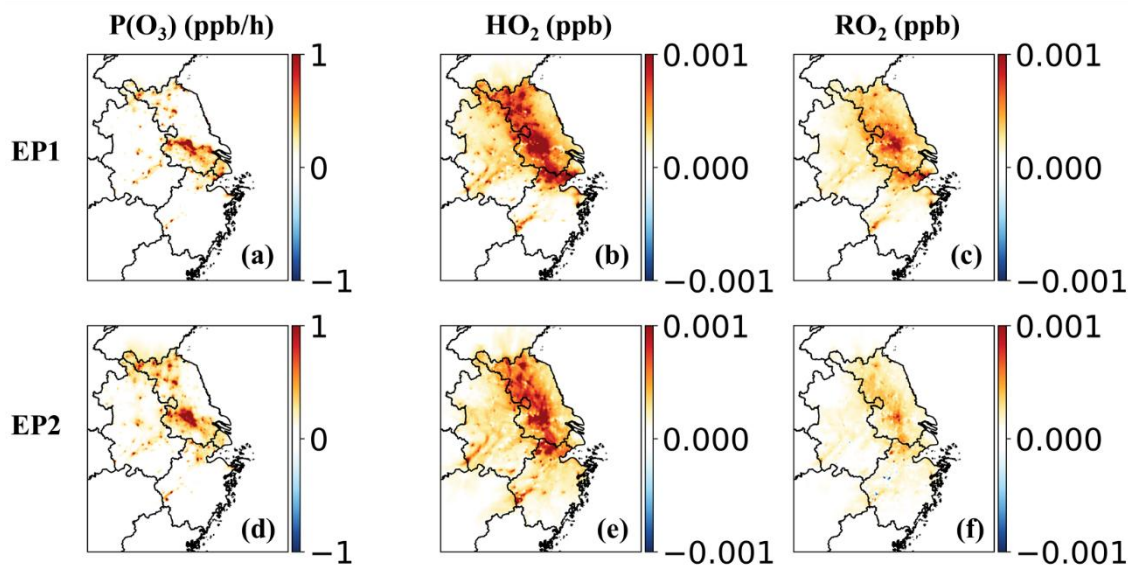

**Figure S12.** Contributions of OVOCs emitted from industrial processes to the daytime ozone production rate ( $P(O_3)$ , ppb  $h^{-1}$ ) and  $HO_2$  and  $RO_2$  radical concentrations (ppb) during EP1 and EP2. The contributions are quantified as the differences between the base case and a sensitivity case in which OVOC emissions from the corresponding sources are set to zero.

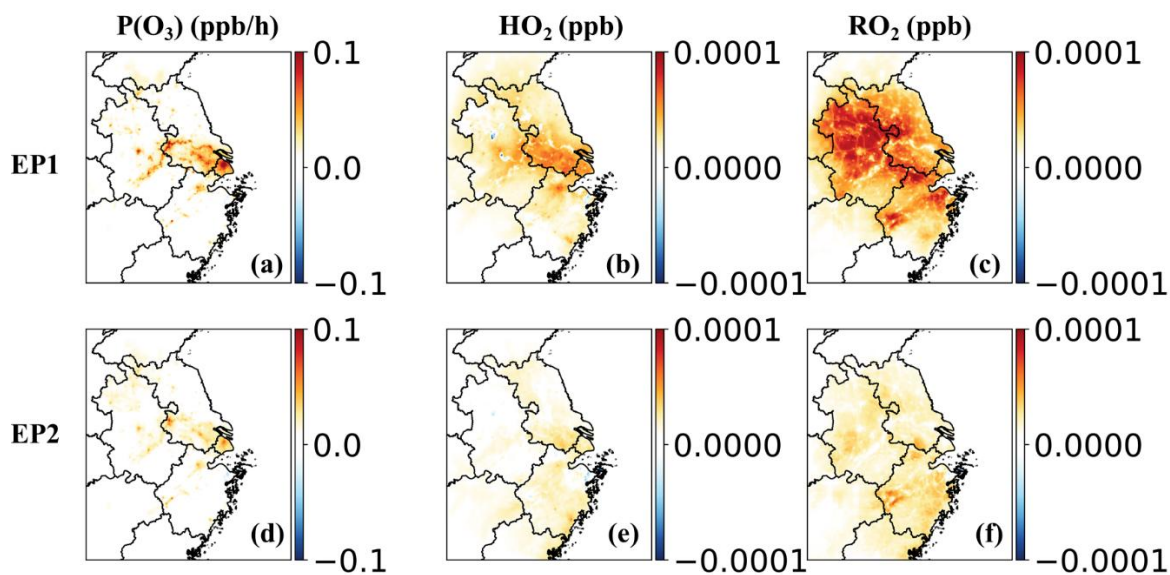

**Figure S13.** Same as Fig. S12 but for OVOCs emitted from residential sources.

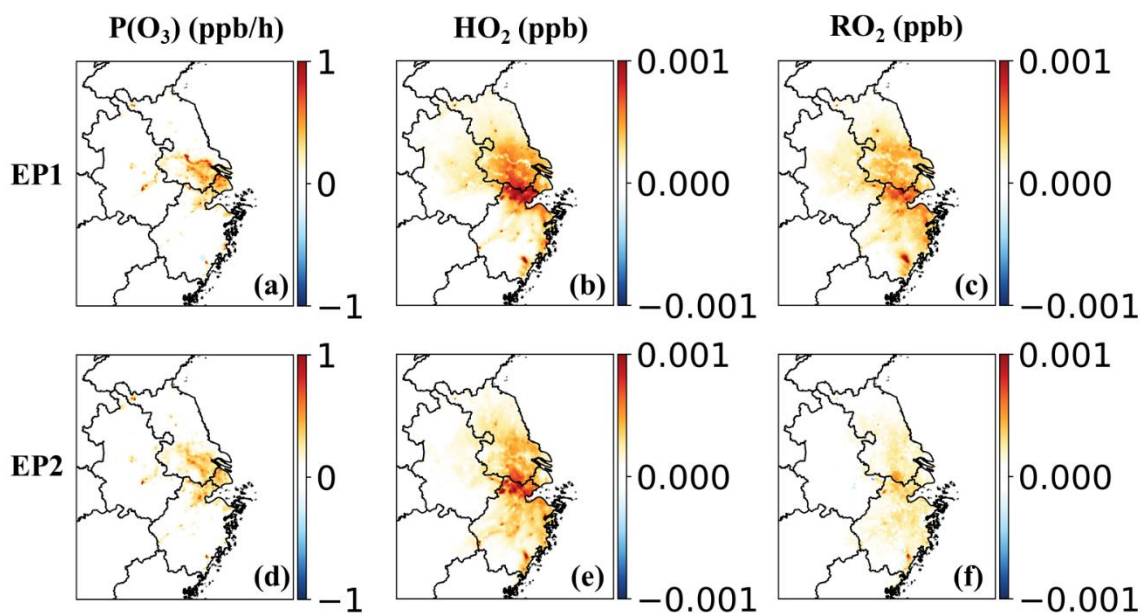

**Figure S14.** Same as Fig. S12 but for OVOCs emitted from solvent use sources.

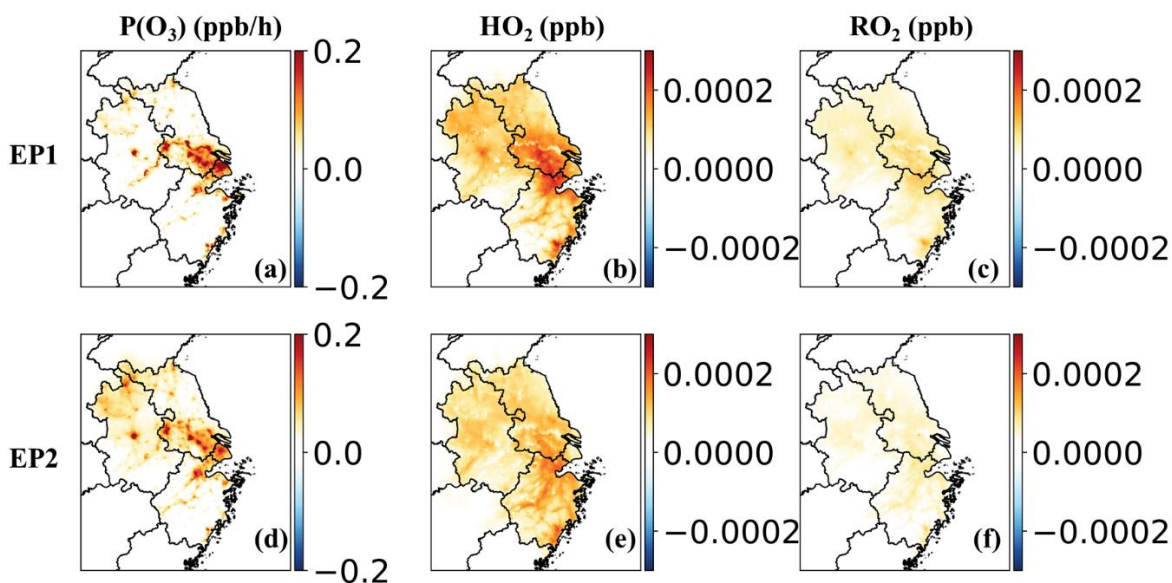

**Figure S15.** Same as Fig. S12 but for OVOCs emitted from transportation sources.

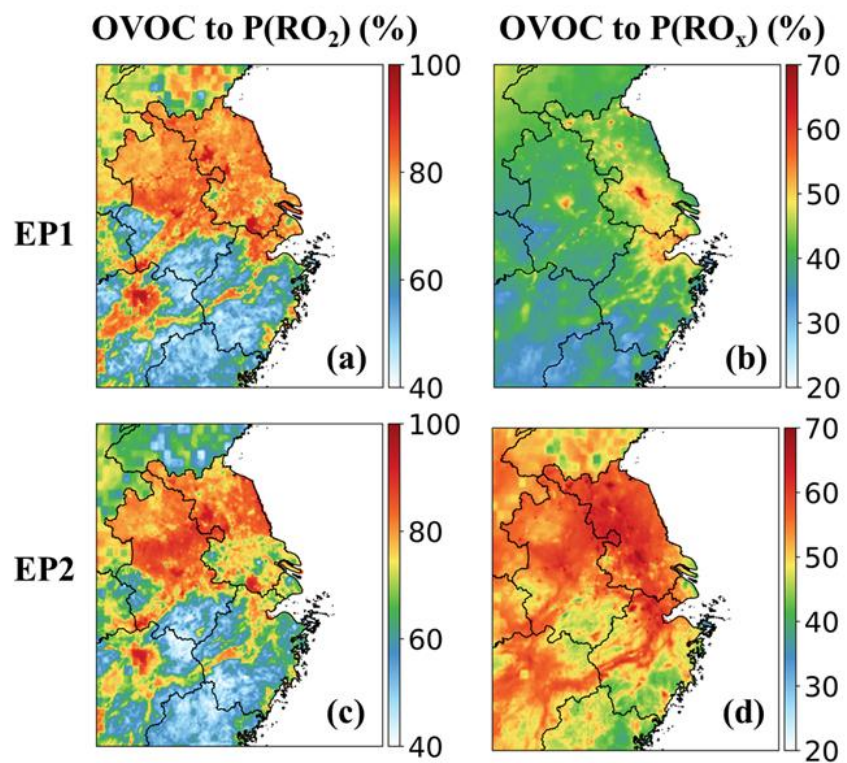

**Figure S16.** Contributions of OVOCs to the daytime primary RO<sub>2</sub> and RO<sub>x</sub> production during EP1 and EP2.

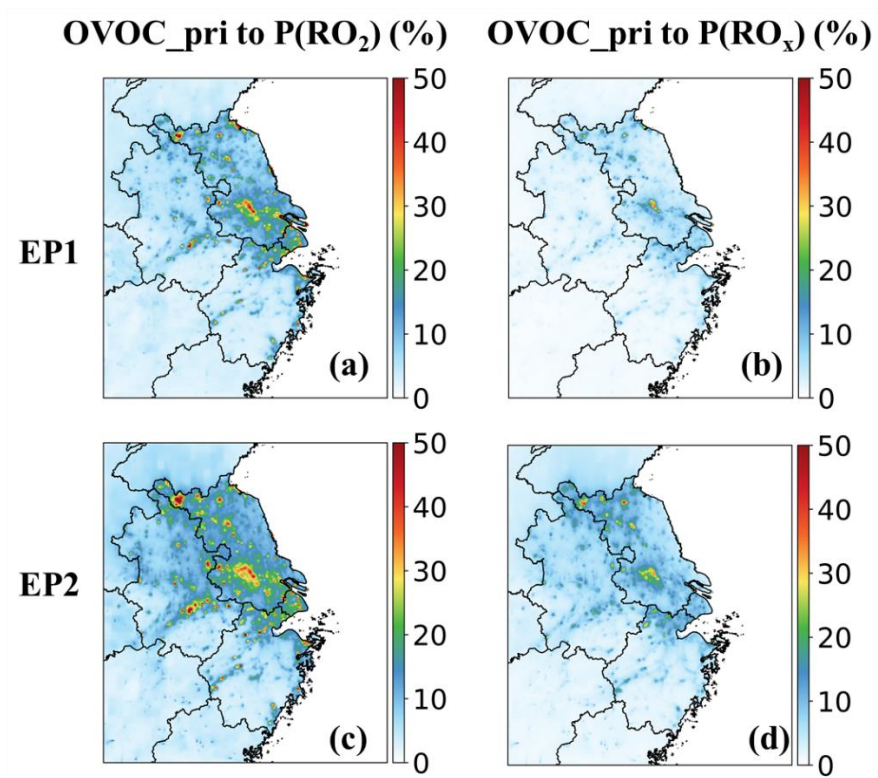

**Figure S17.** Contributions of primary OVOCs to total primary RO<sub>2</sub> (a, c) and RO<sub>x</sub> (b, d) production during the daytime of EP1 and EP2.

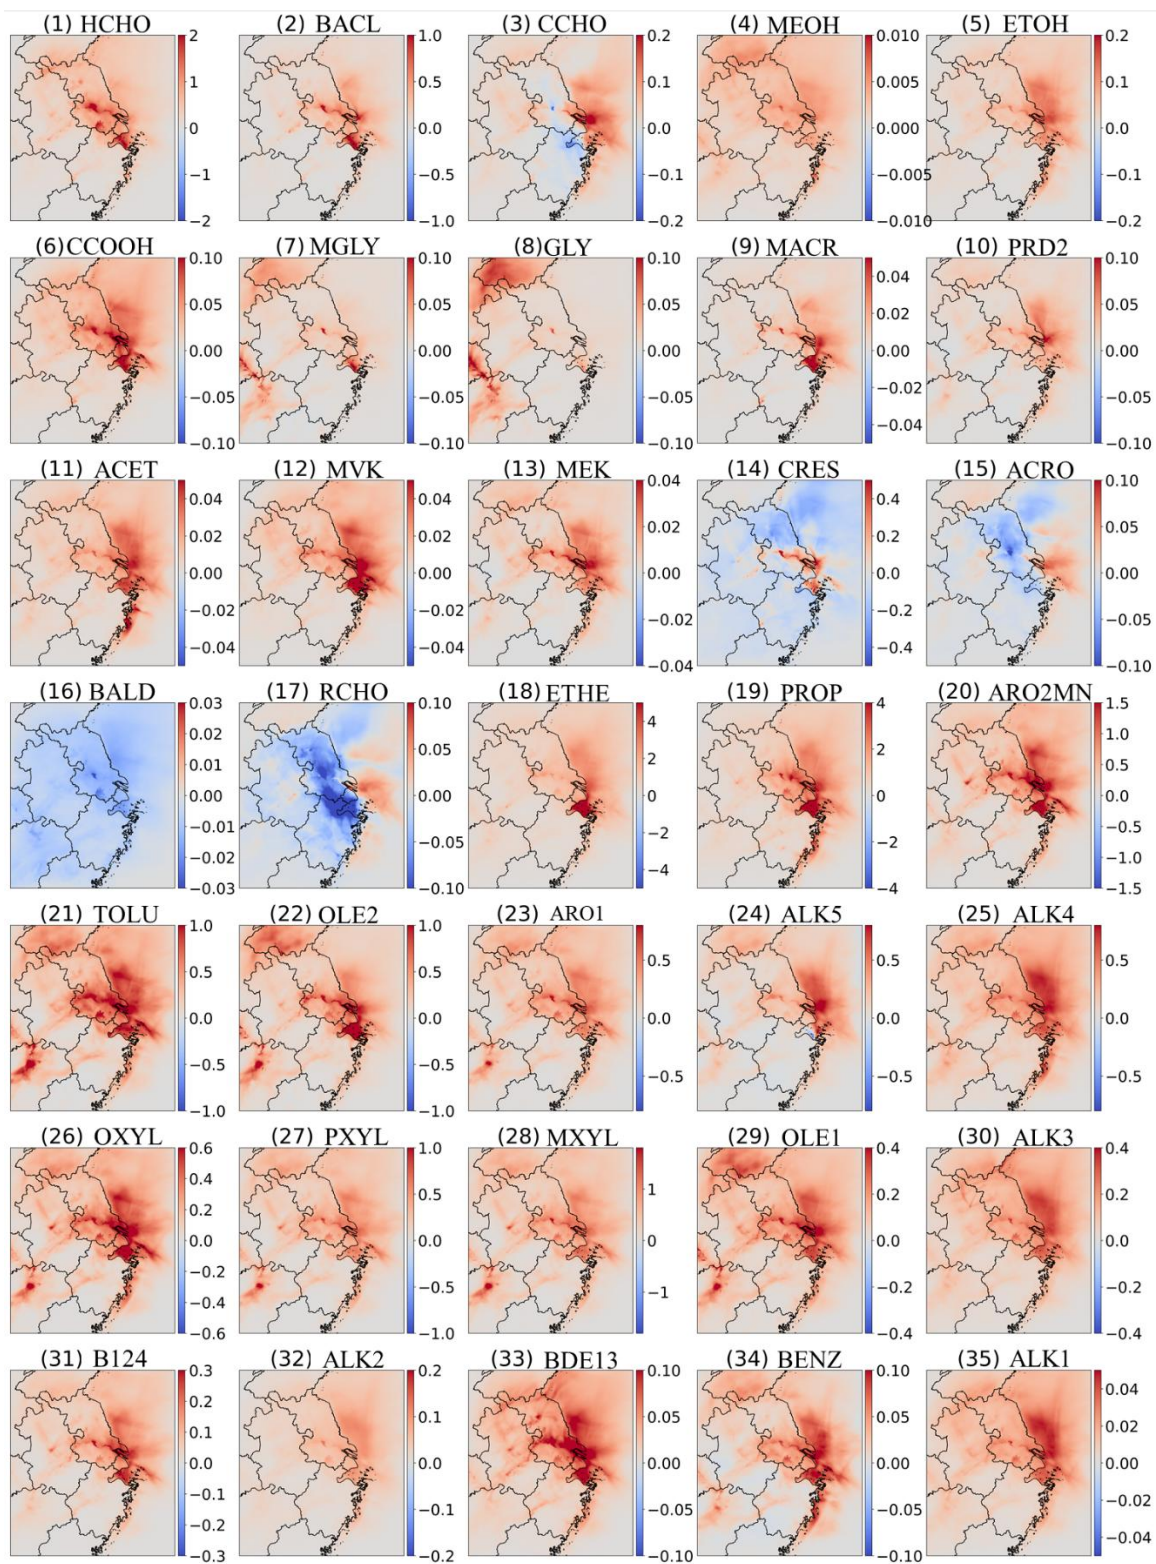

**Figure S18.** Daytime average ozone variations influenced by primary OVOCs and VOC precursors from April 1 to 7, 2019 (ppb).

**Table S1.** Definitions of OVOCs and other VOC species used in the model.

| <b>Species</b> | <b>Definition</b>                                                                                                                                                                                                                                         |
|----------------|-----------------------------------------------------------------------------------------------------------------------------------------------------------------------------------------------------------------------------------------------------------|
| HCHO           | Formaldehyde                                                                                                                                                                                                                                              |
| CCHO           | Acetaldehyde                                                                                                                                                                                                                                              |
| ACRO           | Acrolein                                                                                                                                                                                                                                                  |
| ACET           | Acetone                                                                                                                                                                                                                                                   |
| MACR           | Methacrolein                                                                                                                                                                                                                                              |
| MEK            | Ketones and other non-aldehyde oxygenated products which react with OH radicals faster than $5 \times 10^{-13}$ but slower than $5 \times 10^{-12}$ $\text{cm}^3 \text{ molec}^{-1} \text{ sec}^{-1}$ . (Based on the mechanism for methyl ethyl ketone). |
| MVK            | Methyl Vinyl Ketone                                                                                                                                                                                                                                       |
| RCHO           | Lumped $\text{C}_3+$ Aldehydes (mechanism based on propionaldehyde)                                                                                                                                                                                       |
| PRD2           | Ketones and other non-aldehyde oxygenated products which react with OH radicals faster than $5 \times 10^{-12}$ $\text{cm}^3 \text{ molec}^{-1} \text{ sec}^{-1}$ .                                                                                       |
| GLY            | Glyoxal                                                                                                                                                                                                                                                   |
| MGLY           | Methylglyoxal                                                                                                                                                                                                                                             |
| HCOOH          | Formic acid                                                                                                                                                                                                                                               |
| CCOOH          | Acetic acid                                                                                                                                                                                                                                               |
| PAN            | Peroxyacetyl Nitrate                                                                                                                                                                                                                                      |
| RNO3           | Lumped organic nitrates                                                                                                                                                                                                                                   |
| AFG1           | Lumped photoreactive monounsaturated dicarbonyl aromatic fragmentation products that photolyze to form radicals                                                                                                                                           |
| AFG2           | Lumped photoreactive monounsaturated dicarbonyl aromatic fragmentation products that photolyze to form non-radical products                                                                                                                               |
| AFG3           | Lumped diunsaturated dicarbonyl aromatic fragmentation product                                                                                                                                                                                            |
| MEOH           | Methanol                                                                                                                                                                                                                                                  |
| ETOH           | Ethanol                                                                                                                                                                                                                                                   |

|        |                                                                                                                                                                                                            |
|--------|------------------------------------------------------------------------------------------------------------------------------------------------------------------------------------------------------------|
| CRES   | Phenols and Cresols                                                                                                                                                                                        |
| BACL   | Biacetyl                                                                                                                                                                                                   |
| BALD   | Aromatic aldehydes (e.g., benzaldehyde)                                                                                                                                                                    |
| IPRD   | Lumped isoprene product species                                                                                                                                                                            |
| ETHE   | Ethene                                                                                                                                                                                                     |
| PROP   | Propene                                                                                                                                                                                                    |
| ISOP   | Isoprene                                                                                                                                                                                                   |
| BDE13  | 1,3-Butadiene                                                                                                                                                                                              |
| OLE1   | Alkenes (other than ethene) with $k_{OH} < 7 \times 10^4 \text{ ppm}^{-1} \text{ min}^{-1}$ .                                                                                                              |
| OLE2   | Alkenes with $k_{OH} > 7 \times 10^4 \text{ ppm}^{-1} \text{ min}^{-1}$ .                                                                                                                                  |
| ACYE   | Acetylene                                                                                                                                                                                                  |
| ALK1   | Alkanes and other non-aromatic compounds that react only with OH, and have $k_{OH}$ between $2 \times 10^2$ and $5 \times 10^2 \text{ ppm}^{-1} \text{ min}^{-1}$ .<br>(Primarily ethane)                  |
| ALK2   | Alkanes and other non-aromatic compounds that react only with OH, and have $k_{OH}$ between $5 \times 10^2$ and $2.5 \times 10^3 \text{ ppm}^{-1} \text{ min}^{-1}$ .<br>(Primarily propane and acetylene) |
| ALK3   | Alkanes and other non-aromatic compounds that react only with OH, and have $k_{OH}$ between $2.5 \times 10^3$ and $5 \times 10^3 \text{ ppm}^{-1} \text{ min}^{-1}$ .                                      |
| ALK4   | Alkanes and other non-aromatic compounds that react only with OH, and have $k_{OH}$ between $5 \times 10^3$ and $1 \times 10^4 \text{ ppm}^{-1} \text{ min}^{-1}$ .                                        |
| ALK5   | Alkanes and other non-aromatic compounds that react only with OH, and have $k_{OH}$ greater than $1 \times 10^4 \text{ ppm}^{-1} \text{ min}^{-1}$ .                                                       |
| ARO1   | Aromatics with $k_{OH} < 2 \times 10^4 \text{ ppm}^{-1} \text{ min}^{-1}$ .                                                                                                                                |
| ARO2MN | Aromatics with $k_{OH} > 2 \times 10^4 \text{ ppm}^{-1} \text{ min}^{-1}$ , excluding naphthalene                                                                                                          |
| BENZ   | Benzene                                                                                                                                                                                                    |
| TOLU   | Toluene                                                                                                                                                                                                    |
| OXYL   | o-Xylene                                                                                                                                                                                                   |
| MXYL   | m-Xylene                                                                                                                                                                                                   |
| PXYL   | p-Xylene                                                                                                                                                                                                   |
| B124   | 1,2,4-Trimethyl benzene                                                                                                                                                                                    |

**Table S2.** Comparison of source-specific contributions of different OVOC species to total VOCs between the 2017 and 2019 YRD emission inventories. ALD, KET, ALH, and EST denote aldehydes, ketones, alcohols, and esters, respectively.

| Source <sup>a</sup> | Emission Inventory | ALD   | KET   | ALH   | EST   | Others | Total OVOCs |
|---------------------|--------------------|-------|-------|-------|-------|--------|-------------|
| INB                 | 2017               | 4.65% | 0.78% | 3.68% | 1.14% | 1.81%  | 12.1%       |
|                     | 2019               | 5.37% | 1.27% | 1.98% | 0.78% | 2.71%  | 12.1%       |
| INP                 | 2017               | 6.06% | 4.65% | 11.3% | 4.58% | 5.77%  | 32.3%       |
|                     | 2019               | 12.6% | 5.58% | 4.17% | 2.74% | 14.2%  | 39.2%       |
| RES                 | 2017               | 1.16% | 5.16% | 6.09% | 0.51% | 2.82%  | 15.7%       |
|                     | 2019               | 1.16% | 5.16% | 6.09% | 0.51% | 2.82%  | 15.7%       |
| RBB                 | 2017               | 24.1% | 13.5% | 0.54% | 0.01% | 0.08%  | 38.2%       |
|                     | 2019               | 25.9% | 17.6% | 0.00% | 0.00% | 1.12%  | 44.6%       |
| COK                 | 2017               | 12.7% | 2.33% | 0.00% | 0.00% | 0.08%  | 15.1%       |
|                     | 2019               | 12.7% | 2.33% | 0.00% | 0.00% | 0.08%  | 15.1%       |
| NRD                 | 2017               | 2.72% | 2.72% | 6.67% | 2.07% | 4.32%  | 18.5%       |
|                     | 2019               | 2.72% | 2.72% | 6.67% | 2.07% | 4.32%  | 18.5%       |
| GVE                 | 2017               | 0.82% | 1.64% | 6.47% | 2.73% | 4.09%  | 15.8%       |
|                     | 2019               | 7.63% | 2.57% | 1.42% | 0.29% | 3.12%  | 15.0%       |
| DVE                 | 2017               | 11.8% | 6.40% | 2.25% | 8.13% | 3.98%  | 32.5%       |
|                     | 2019               | 21.0% | 2.13% | 0.11% | 2.46% | 31.2%  | 56.9%       |
| POW                 | 2017               | 4.56% | 2.06% | 0.00% | 0.00% | 0.02%  | 6.64%       |
|                     | 2019               | 4.56% | 2.06% | 0.00% | 0.00% | 0.02%  | 6.64%       |
| SHP                 | 2017               | 2.92% | 9.71% | 2.65% | 3.10% | 0.52%  | 18.9%       |
|                     | 2019               | 2.92% | 9.71% | 2.65% | 3.10% | 0.52%  | 18.9%       |

<sup>a</sup>INP: industry process; INB: industrial boiler and kiln; RES: residential emissions excluding biomass burning; RBB: residential biomass burning; COK: cooking; GVE: gasoline vehicle; DVE: diesel vehicle; NRD: non-road machine; POW: power plant; SHP: ship emissions)

**Table S3.** Statistical metrics of meteorological parameters in Shanghai (SH), Nanjing (NJ), Hefei (HF), and Hangzhou (HZ)<sup>a</sup> in EP1 and EP2. Benchmark values are based on Emery et al<sup>2</sup>.

| Episode | Stations | Factor | MB    | ME   | RMSE  | R    | IOA  |
|---------|----------|--------|-------|------|-------|------|------|
| EP1     | SH       | T      | -0.97 | 1.53 | 2     | 0.92 | 0.95 |
|         |          | RH     | 2.03  | 9.50 | 12.2  | 0.83 | 0.9  |
|         |          | WD     | -5.63 | 92.1 | 139.7 | 0.30 | 0.62 |
|         |          | WS     | 1.34  | 1.54 | 1.79  | 0.58 | 0.63 |
|         | NJ       | T      | -0.43 | 2.21 | 1.81  | 0.95 | 0.97 |
|         |          | RH     | -0.81 | 9.98 | 10.6  | 0.86 | 0.92 |
|         |          | WD     | 48.8  | 82.3 | 117.3 | 0.38 | 0.66 |
|         |          | WS     | 2.39  | 2.49 | 1.41  | 0.68 | 0.78 |
|         | HF       | T      | 0.68  | 1.76 | 2.32  | 0.93 | 0.96 |
|         |          | RH     | -10.7 | 14.1 | 18.7  | 0.76 | 0.81 |
|         |          | WD     | 9.82  | 89.9 | 133.0 | 0.27 | 0.61 |
|         |          | WS     | 0.08  | 1.09 | 1.41  | 0.70 | 0.8  |
|         | HZ       | T      | 1.6   | 2.26 | 1.5   | 0.93 | 0.96 |
|         |          | RH     | -7.35 | 11.0 | 11.5  | 0.78 | 0.88 |
|         |          | WD     | 9.01  | 86.9 | 147.4 | 0.28 | 0.62 |
|         |          | WS     | 1.05  | 1.65 | 1.32  | 0.60 | 0.77 |
| EP2     | SH       | T      | -0.65 | 1.44 | 3.04  | 0.82 | 0.9  |
|         |          | RH     | -0.94 | 8.12 | 12.81 | 0.78 | 0.88 |
|         |          | WD     | -35.2 | 66.4 | 116.8 | 0.26 | 0.55 |
|         |          | WS     | 0.6   | 1.16 | 2.88  | 0.51 | 0.49 |
|         | NJ       | T      | 1.04  | 2.26 | 3.18  | 0.85 | 0.9  |
|         |          | RH     | -2.08 | 11.3 | 14.3  | 0.76 | 0.86 |
|         |          | WD     | 25.2  | 74.3 | 114.6 | 0.29 | 0.61 |
|         |          | WS     | 1.47  | 1.98 | 2.51  | 0.36 | 0.56 |
|         | HF       | T      | -0.17 | 1.1  | 3.31  | 0.87 | 0.91 |
|         |          | RH     | 0.55  | 8.88 | 14.2  | 0.80 | 0.86 |
|         |          | WD     | -26.0 | 97.8 | 125.2 | 0.24 | 0.58 |
|         |          | WS     | -0.31 | 1.01 | 2.16  | 0.53 | 0.67 |
|         | HZ       | T      | 0.18  | 2.73 | 3.62  | 0.80 | 0.89 |
|         |          | RH     | -3.78 | 11.5 | 15.3  | 0.68 | 0.82 |
|         |          | WD     | -11.3 | 97.4 | 132.9 | 0.14 | 0.52 |
|         |          | WS     | 1.51  | 1.92 | 2.53  | 0.33 | 0.49 |

<sup>a</sup> The locations of these stations are indicated in Figure S1. Benchmark values are  $MB \leq \pm 0.5$  K,  $ME \leq 2$  K for T;  $MB \leq \pm 10$  deg,  $ME \leq \pm 30$  deg for WD;  $MB \leq \pm 0.5$  m/s,  $RMSE \leq 2$  m/s for WS.

**Table S4.** Statistical metrics of MDA8 O<sub>3</sub> in selected cities in the YRD. Benchmark values are based on Emery et al<sup>3</sup>.

| Site      | Episode | NMB    | NME   | RMSE | R    | IOA  |
|-----------|---------|--------|-------|------|------|------|
| SH        | EP1     | 0.031  | 0.33  | 22.3 | 0.37 | 0.65 |
|           | EP2     | 0.068  | 0.20  | 12.5 | 0.30 | 0.54 |
| HF        | EP1     | 0.23   | 0.32  | 21.7 | 0.44 | 0.59 |
|           | EP2     | 0.50   | 0.55  | 19.0 | 0.14 | 0.43 |
| BB        | EP1     | 0.18   | 0.29  | 20.2 | 0.37 | 0.55 |
|           | EP2     | 0.23   | 0.32  | 13.4 | 0.47 | 0.64 |
| MAS       | EP1     | 0.17   | 0.29  | 20.4 | 0.41 | 0.55 |
|           | EP2     | 0.29   | 0.36  | 14.3 | 0.46 | 0.56 |
| NJ        | EP1     | 0.22   | 0.35  | 24.2 | 0.34 | 0.53 |
|           | EP2     | 0.22   | 0.29  | 11.6 | 0.53 | 0.57 |
| WX        | EP1     | 0.19   | 0.33  | 23.5 | 0.38 | 0.57 |
|           | EP2     | 0.38   | 0.40  | 18.1 | 0.52 | 0.56 |
| XZ        | EP1     | 0.034  | 0.20  | 15.4 | 0.51 | 0.69 |
|           | EP2     | 0.28   | 0.29  | 11.2 | 0.70 | 0.68 |
| YC        | EP1     | -0.11  | 0.19  | 15.1 | 0.67 | 0.76 |
|           | EP2     | 0.13   | 0.19  | 9.54 | 0.61 | 0.68 |
| LYG       | EP1     | -0.14  | 0.22  | 16.1 | 0.64 | 0.71 |
|           | EP2     | 0.24   | 0.28  | 11.6 | 0.72 | 0.73 |
| HZ        | EP1     | 0.35   | 0.46  | 29.8 | 0.23 | 0.52 |
|           | EP2     | 0.55   | 0.60  | 24.9 | 0.34 | 0.50 |
| NB        | EP1     | 0.039  | 0.31  | 22.2 | 0.20 | 0.51 |
|           | EP2     | 0.19   | 0.23  | 12.6 | 0.60 | 0.68 |
| JX        | EP1     | 0.23   | 0.36  | 26.5 | 0.20 | 0.51 |
|           | EP2     | 0.35   | 0.40  | 18.8 | 0.50 | 0.57 |
| JH        | EP1     | 0.11   | 0.28  | 17.7 | 0.24 | 0.50 |
|           | EP2     | 0.26   | 0.34  | 17.1 | 0.60 | 0.62 |
| LS        | EP1     | 0.14   | 0.22  | 14.1 | 0.32 | 0.57 |
|           | EP2     | 0.032  | 0.19  | 11.8 | 0.56 | 0.69 |
| Benchmark |         | <±0.15 | <0.25 |      | >0.5 |      |

**Table S5.** Statistical metrics of OVOCs and VOC precursors in Shanghai in EP1 and EP2.

| Species | Episode | Obs (ppb) | Pred (ppb) | NMB    | NME  | RMSE  | R     | IOA  |
|---------|---------|-----------|------------|--------|------|-------|-------|------|
| HCHO    | EP1     | 2.52      | 1.85       | -0.26  | 0.39 | 1.38  | 0.55  | 0.70 |
|         | EP2     | 2.58      | 2.05       | -0.21  | 0.32 | 1.10  | 0.72  | 0.79 |
| CCHO    | EP1     | 1.25      | 0.85       | -0.32  | 0.49 | 0.78  | 0.46  | 0.63 |
|         | EP2     | 0.56      | 0.93       | 0.64   | 0.74 | 0.60  | 0.60  | 0.56 |
| ACRO    | EP1     | 0.15      | 0.090      | -0.40  | 0.55 | 0.11  | 0.16  | 0.47 |
|         | EP2     | 0.053     | 0.15       | 1.75   | 1.81 | 0.13  | 0.46  | 0.33 |
| ACET    | EP1     | 5.75      | 1.40       | -0.76  | 0.76 | 5.44  | 0.25  | 0.44 |
|         | EP2     | 1.89      | 1.54       | -0.19  | 0.43 | 1.11  | 0.39  | 0.61 |
| MACR    | EP1     | 0.030     | 0.037      | 0.24   | 0.91 | 0.045 | 0.052 | 0.21 |
|         | EP2     | 0.018     | 0.032      | 0.79   | 1.06 | 0.027 | 0.36  | 0.43 |
| MEK     | EP1     | 1.07      | 0.70       | -0.35  | 0.45 | 0.84  | 0.27  | 0.46 |
|         | EP2     | 0.64      | 0.75       | 0.17   | 0.59 | 0.49  | 0.51  | 0.58 |
| MVK     | EP1     | 0.050     | 0.052      | 0.042  | 0.73 | 0.062 | 0.071 | 0.28 |
|         | EP2     | 0.026     | 0.053      | 1.03   | 1.17 | 0.043 | 0.48  | 0.49 |
| RCHO    | EP1     | 0.76      | 0.35       | -0.53  | 0.56 | 0.49  | 0.36  | 0.46 |
|         | EP2     | 0.36      | 0.40       | 0.11   | 0.35 | 0.17  | 0.61  | 0.73 |
| ETOH    | EP1     | 9.56      | 1.82       | -0.81  | 0.81 | 8.98  | 0.28  | 0.41 |
|         | EP2     | 3.24      | 2.97       | -0.084 | 0.80 | 3.58  | 0.039 | 0.37 |
| HCOOH   | EP1     | 0.15      | 0.093      | -0.37  | 0.64 | 0.12  | 0.19  | 0.39 |
|         | EP2     | 1.95      | 0.072      | -0.96  | 0.99 | 3.93  | 0.37  | 0.36 |
| CCOOH   | EP1     | 1.88      | 0.48       | -0.75  | 0.75 | 1.87  | 0.31  | 0.44 |
|         | EP2     | 2.59      | 0.66       | -0.75  | 0.76 | 3.15  | 0.32  | 0.44 |
| CRES    | EP1     | 0.070     | 0.14       | 1.05   | 1.43 | 0.16  | 0.23  | 0.19 |

|       |     |       |       |       |      |       |       |       |
|-------|-----|-------|-------|-------|------|-------|-------|-------|
|       | EP2 | 0.41  | 0.20  | -0.51 | 0.72 | 0.53  | 0.18  | 0.39  |
| PAN   | EP1 | 0.99  | 0.47  | -0.53 | 0.69 | 0.88  | 0.40  | 0.56  |
|       | EP2 | 0.61  | 0.39  | -0.35 | 0.40 | 0.38  | 0.76  | 0.79  |
| ETHE  | EP1 | 1.52  | 1.73  | 0.14  | 0.69 | 1.43  | 0.26  | 0.53  |
|       | EP2 | 1.96  | 2.28  | 0.16  | 0.55 | 2.11  | 0.34  | 0.51  |
| PROP  | EP1 | 0.38  | 0.95  | 1.47  | 1.61 | 0.88  | 0.44  | 0.44  |
|       | EP2 | 0.58  | 1.39  | 1.39  | 1.57 | 1.26  | 0.51  | 0.57  |
| ISOP  | EP1 | 0.038 | 0.017 | -0.55 | 0.66 | 0.047 | 0.067 | 0.37  |
|       | EP2 | 0.019 | 0.024 | 0.23  | 0.79 | 0.022 | 0.22  | 0.44  |
| OLE1  | EP1 | 0.15  | 0.35  | 1.33  | 1.43 | 0.29  | 0.25  | 0.31  |
|       | EP2 | 0.14  | 0.60  | 3.31  | 3.31 | 0.65  | 0.35  | 0.16  |
| OLE2  | EP1 | 0.28  | 0.40  | 0.44  | 0.77 | 0.35  | 0.28  | 0.48  |
|       | EP2 | 0.28  | 0.75  | 1.71  | 1.77 | 0.84  | 0.37  | 0.21  |
| BDE13 | EP1 | 0.022 | 0.061 | 1.74  | 2.02 | 0.063 | 0.12  | 0.26  |
|       | EP2 | 0.011 | 0.11  | 8.80  | 8.80 | 0.14  | 0.30  | 0.078 |
| ACYE  | EP1 | 1.36  | 0.83  | -0.39 | 0.51 | 1.04  | 0.24  | 0.50  |
|       | EP2 | 1.35  | 1.01  | -0.25 | 0.54 | 1.02  | 0.34  | 0.54  |
| ALK1  | EP1 | 8.30  | 1.58  | -0.81 | 0.81 | 8.03  | 0.20  | 0.41  |
|       | EP2 | 6.83  | 2.03  | -0.70 | 0.70 | 5.64  | 0.45  | 0.44  |
| ALK2  | EP1 | 4.29  | 1.17  | -0.73 | 0.73 | 4.40  | 0.26  | 0.45  |
|       | EP2 | 4.22  | 1.55  | -0.63 | 0.65 | 3.82  | 0.43  | 0.47  |
| ALK3  | EP1 | 2.60  | 1.29  | -0.51 | 0.56 | 2.27  | 0.24  | 0.45  |
|       | EP2 | 2.62  | 1.91  | -0.27 | 0.47 | 1.80  | 0.36  | 0.56  |
| ALK4  | EP1 | 3.22  | 2.18  | -0.32 | 0.53 | 2.83  | 0.17  | 0.43  |
|       | EP2 | 2.42  | 3.58  | 0.48  | 0.69 | 2.69  | 0.33  | 0.45  |
| ALK5  | EP1 | 3.21  | 1.20  | -0.63 | 0.66 | 2.54  | 0.19  | 0.44  |

|        |     |       |       |       |      |       |      |      |
|--------|-----|-------|-------|-------|------|-------|------|------|
|        | EP2 | 1.34  | 1.68  | 0.26  | 0.62 | 1.86  | 0.28 | 0.33 |
| ARO1   | EP1 | 0.61  | 0.65  | 0.062 | 0.59 | 0.50  | 0.16 | 0.47 |
|        | EP2 | 0.45  | 1.03  | 1.30  | 1.40 | 0.90  | 0.18 | 0.30 |
| ARO2M  | EP1 | 0.24  | 0.48  | 0.97  | 1.14 | 0.39  | 0.20 | 0.29 |
| N      | EP2 | 0.32  | 0.78  | 1.45  | 1.54 | 0.75  | 0.22 | 0.25 |
| BENZ   | EP1 | 0.49  | 0.56  | 0.15  | 0.55 | 0.38  | 0.29 | 0.54 |
|        | EP2 | 0.47  | 0.81  | 0.73  | 0.80 | 0.56  | 0.41 | 0.43 |
| TOLU   | EP1 | 1.19  | 0.81  | -0.32 | 0.54 | 1.18  | 0.27 | 0.46 |
|        | EP2 | 1.11  | 1.28  | 0.16  | 0.55 | 0.93  | 0.43 | 0.64 |
| M/PXYL | EP1 | 0.56  | 0.92  | 0.64  | 0.99 | 0.79  | 0.22 | 0.44 |
|        | EP2 | 0.63  | 1.56  | 1.48  | 1.58 | 1.52  | 0.21 | 0.27 |
| OXYL   | EP1 | 0.24  | 0.34  | 0.45  | 0.84 | 0.29  | 0.21 | 0.45 |
|        | EP2 | 0.25  | 0.57  | 1.29  | 1.41 | 0.55  | 0.25 | 0.29 |
| B124   | EP1 | 0.045 | 0.091 | 1.03  | 1.17 | 0.073 | 0.28 | 0.32 |
|        | EP2 | 0.053 | 0.15  | 1.77  | 1.80 | 0.15  | 0.27 | 0.17 |

**Table S6.** Proportions of different OVOC species in total primary OVOCs from the anthropogenic sources across the YRD during the two episodes.

| Species | EP1(%) | EP2(%) |
|---------|--------|--------|
| CRES    | 21.6   | 21.9   |
| HCHO    | 15.9   | 15.9   |
| ACET    | 14.4   | 14.3   |
| CCOOH   | 12.5   | 12.5   |
| ETOH    | 9.52   | 9.41   |
| RCHO    | 5.78   | 5.75   |
| CCHO    | 5.55   | 5.55   |
| PRD2    | 3.54   | 3.58   |
| MEK     | 3.54   | 3.53   |
| ACRO    | 2.76   | 2.75   |
| BACL    | 2.32   | 2.35   |
| MEOH    | 0.71   | 0.71   |
| MVK     | 0.58   | 0.56   |
| MACR    | 0.53   | 0.52   |
| BALD    | 0.45   | 0.44   |
| HCOOH   | 0.16   | 0.16   |
| MGLY    | 0.11   | 0.11   |
| GLY     | 0.05   | 0.05   |

**Table S7.** Molar yields of NO<sub>2</sub> from RO<sub>2</sub> and NO reactions that form alkyl nitrate coproducts in SAPRC07tic.

| Reactants       | Molar yield of NO <sub>2</sub> | Description                                                                                                                         |
|-----------------|--------------------------------|-------------------------------------------------------------------------------------------------------------------------------------|
| TERPNRO2 + NO   | 0.827                          | Monoterpene + NO <sub>3</sub> peroxy radical (TERPNRO2) reaction with NO                                                            |
| ISOPO2 + NO     | 0.883                          | Isoprene + OH peroxy radical (ISOPO2) reaction with NO                                                                              |
| NISOPO2 + NO    | 1.0                            | Isoprene + NO <sub>3</sub> peroxy radical (NISOPO2) reaction with NO                                                                |
| ISOPNOOB + NO   | 1.0                            | β-hydroxy isoprene nitrates + OH peroxy radical (ISOPNOOB) reaction with NO                                                         |
| ISOPNOOD + NO   | 1.0                            | δ-hydroxy isoprene nitrates + OH peroxy radical (ISOPNOOD) reaction with NO                                                         |
| MVKOO + NO      | 0.89                           | MVK + OH peroxy radical (MVKOO) reaction with NO                                                                                    |
| MACROO + NO     | 0.85                           | MACR + OH peroxy radical (MACROO) reaction with NO                                                                                  |
| NIT1NO3OOA + NO | 1.0                            | C <sub>5</sub> carbonyl nitrates + NO <sub>3</sub> acyl peroxy radical via abstraction of aldehydic H (NIT1NO3OOA) reaction with NO |
| NIT1NO3OOB + NO | 0.94                           | C <sub>5</sub> carbonyl nitrates + NO <sub>3</sub> peroxy radical via addition to double bond (NIT1NO3OOB) reaction with NO         |
| NIT1OHOO + NO   | 0.934                          | C <sub>5</sub> carbonyl nitrates + OH peroxy radical (NIT1OHOO) reaction with NO                                                    |

## References

1. Qin, M.; Hu, A.; Mao, J.; Li, X.; Sheng, L.; Sun, J.; Li, J.; Wang, X.; Zhang, Y.; Hu, J., PM2.5 and O3 relationships affected by the atmospheric oxidizing capacity in the Yangtze River Delta, China. *Science of the Total Environment* **2022**, *810*, 152268.
2. Emery, C.; Edward, T.; and Yarwood, G. Enhanced Meteorological Modeling and Performance Evaluation for Two Texas Ozone Episodes. Report to the Texas Natural Resources Conservation Commission, ENVIRON International Corporation, Novato, CA, 2001.
3. Emery, C.; Liu, Z.; Russell, A. G.; Odman, M. T.; Yarwood, G.; Kumar, N. Recommendations on statistics and benchmarks to assess photochemical model performance. *Journal of the Air & Waste Management Association* 2017, *67* (5), 582-598. DOI: 10.1080/10962247.2016.1265027.
